# Supplementary material for: Comprehensive Genomic Profiling of Circulating Tumor DNA in Patients with Previously Treated Metastatic Colorectal Cancer: Analysis of a Real-World Healthcare Claims Database
Source: MDPI journal article supplement (doi:10.3390/curroncol29050277), 2022-05-09
Supplement: s1 [file s1]

Supplementary materials

# Comprehensive Genomic Profiling of Circulating Tumor DNA in Patients with Previously Treated Metastatic Colorectal Cancer: Analysis of a Real-World Healthcare Claims Database

Yoshiaki Nakamura, Steven Olsen, Nicole Zhang, Jiemin Liao and Takayuki Yoshino

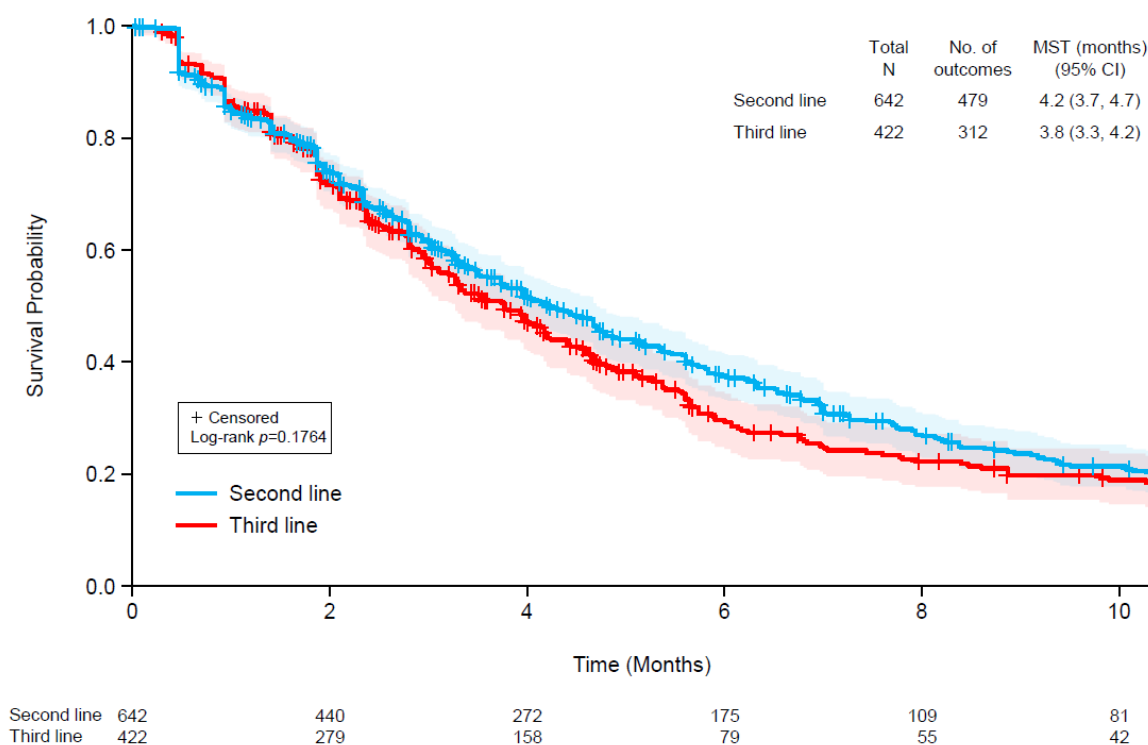

**Figure S1.** Kaplan–Meier plots of time to treatment discontinuation following second-line (blue) or third-line (red) therapy after Guardant360 testing. The shaded regions indicate 95% confidence intervals. CI, confidence interval; MST, median survival time.

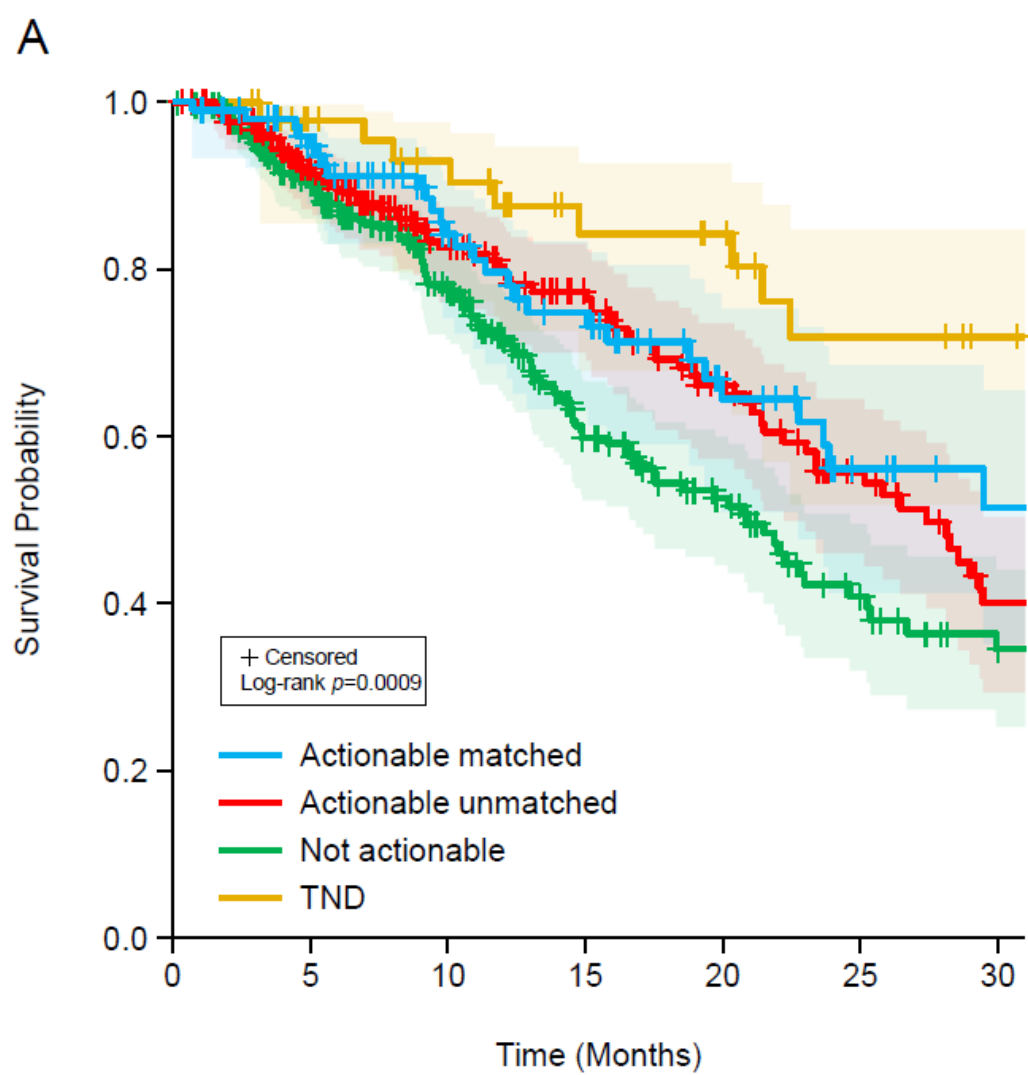

|                      |     |     |     |    |    |    |    |
|----------------------|-----|-----|-----|----|----|----|----|
| Actionable matched   | 101 | 85  | 57  | 44 | 27 | 16 | 11 |
| Actionable unmatched | 213 | 167 | 119 | 91 | 61 | 39 | 24 |
| Not actionable       | 280 | 215 | 145 | 86 | 54 | 30 | 18 |
| TND                  | 48  | 41  | 36  | 25 | 23 | 17 | 14 |

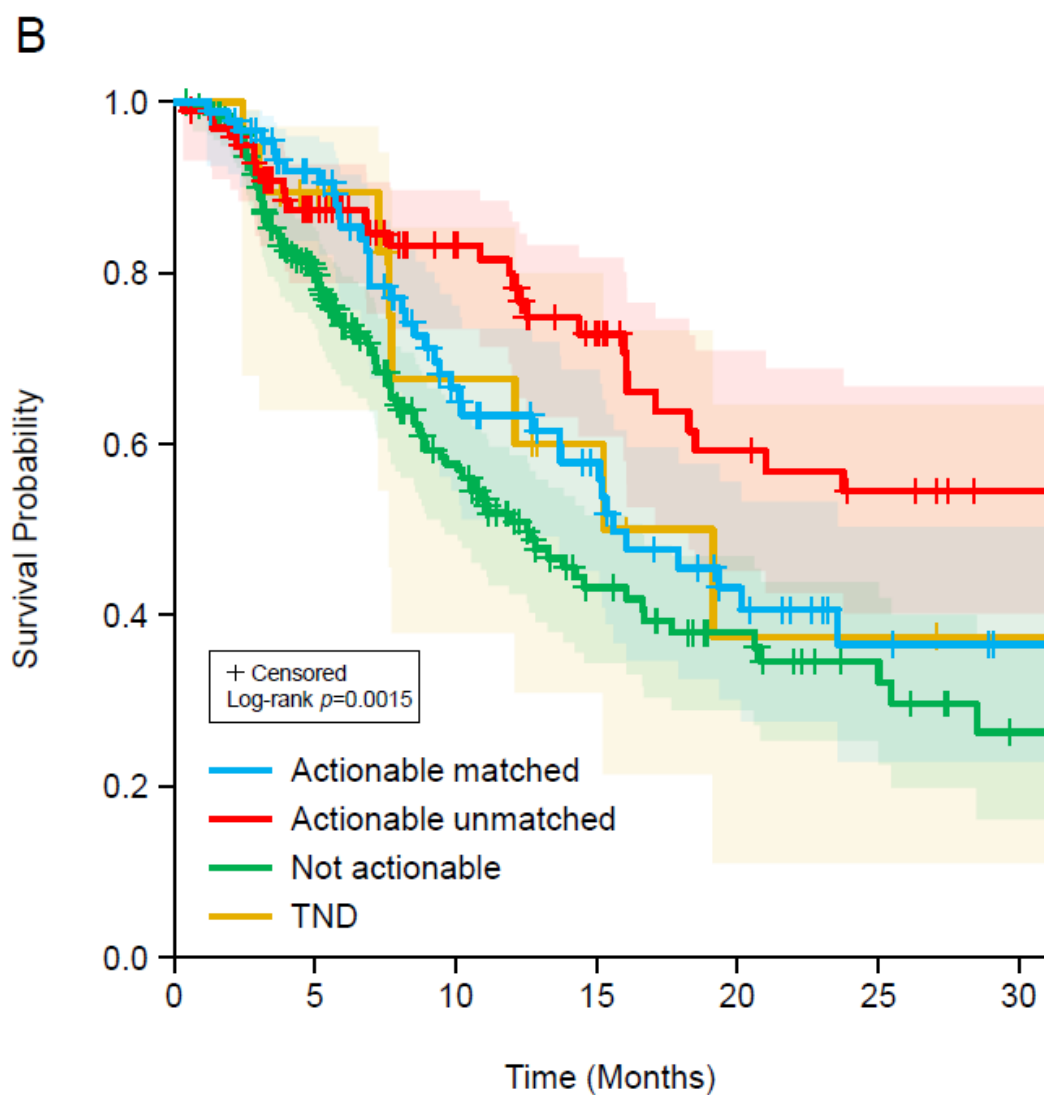

|                      |     |     |    |    |    |    |    |
|----------------------|-----|-----|----|----|----|----|----|
| Actionable matched   | 92  | 73  | 42 | 29 | 17 | 9  | 6  |
| Actionable unmatched | 101 | 71  | 52 | 36 | 26 | 22 | 18 |
| Not actionable       | 210 | 138 | 73 | 34 | 23 | 14 | 7  |
| TND                  | 19  | 15  | 9  | 6  | 3  | 3  | 2  |

**Figure S2.** Kaplan–Meier plots of overall survival following second- (A) or third- (B) line therapy in patients who underwent Guardant360 testing: (1) patients with a clinically actionable genomic profile who received matched therapy (blue); (2) patients with a clinically actionable genomic profile who did not receive matched therapy (red); (3) patients without a clinically actionable genomic profile (green); and (4) patients in whom ctDNA was not detected (brown). The shaded regions indicate 95% confidence intervals.
